# Supplementary material for: Safety and Tolerability of Difelikefalin for the Treatment of Moderate to Severe Pruritus in Hemodialysis Patients: Pooled Analysis From the Phase 3 Clinical Trial Program
Source: PubMed Central journal article supplement — Kidney Med. 2022 Jun 28;4(8):100513. doi: 10.1016/j.xkme.2022.100513 (PMC9418597; doi:10.1016/j.xkme.2022.100513), 2022-06-28
Supplement: mmc1.pdf [file mmc1.pdf]

# Supplementary Figure 1. CLIN3101

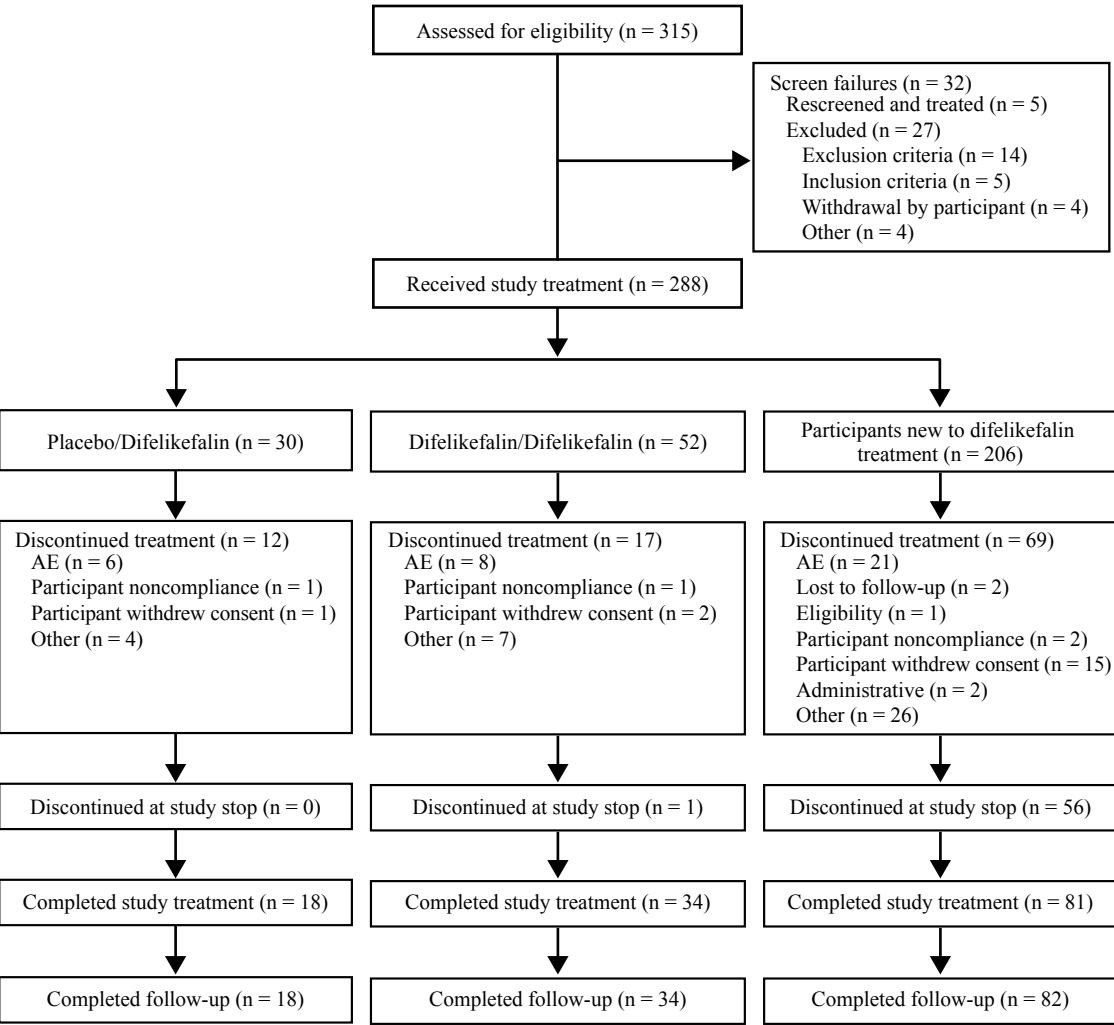

AE, adverse event.

## Supplementary Figure 2. CLIN3105

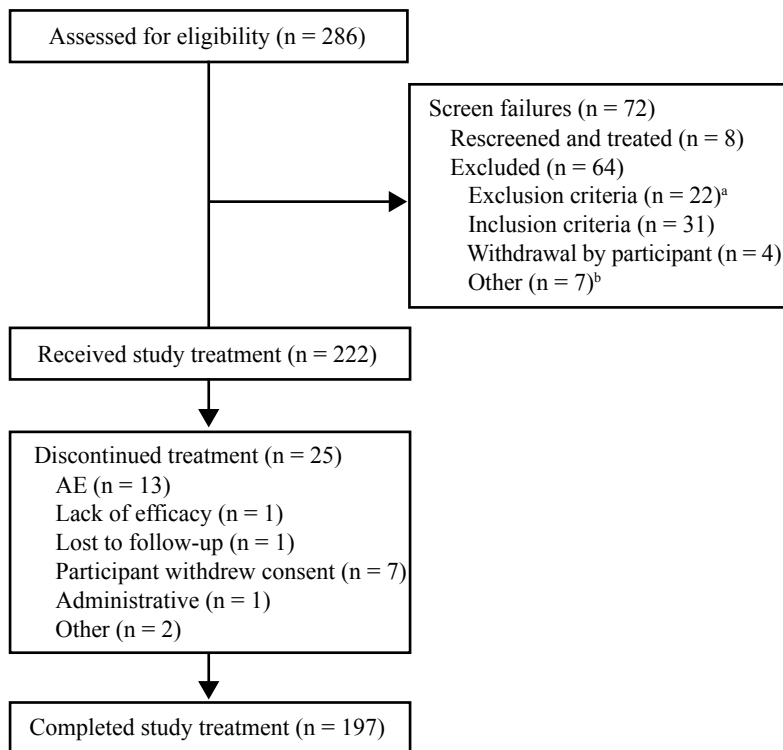

<sup>a</sup>Excluded 1 participant who was rescreened and enrolled.

<sup>b</sup>Seven of the 14 participants who failed initial screening were included upon rescreening. For participants who screen-failed more than once, the reason for failure was the final screen failure.

AE, adverse event.

### Supplementary Figure 3. KALM-1 Double-blind Phase

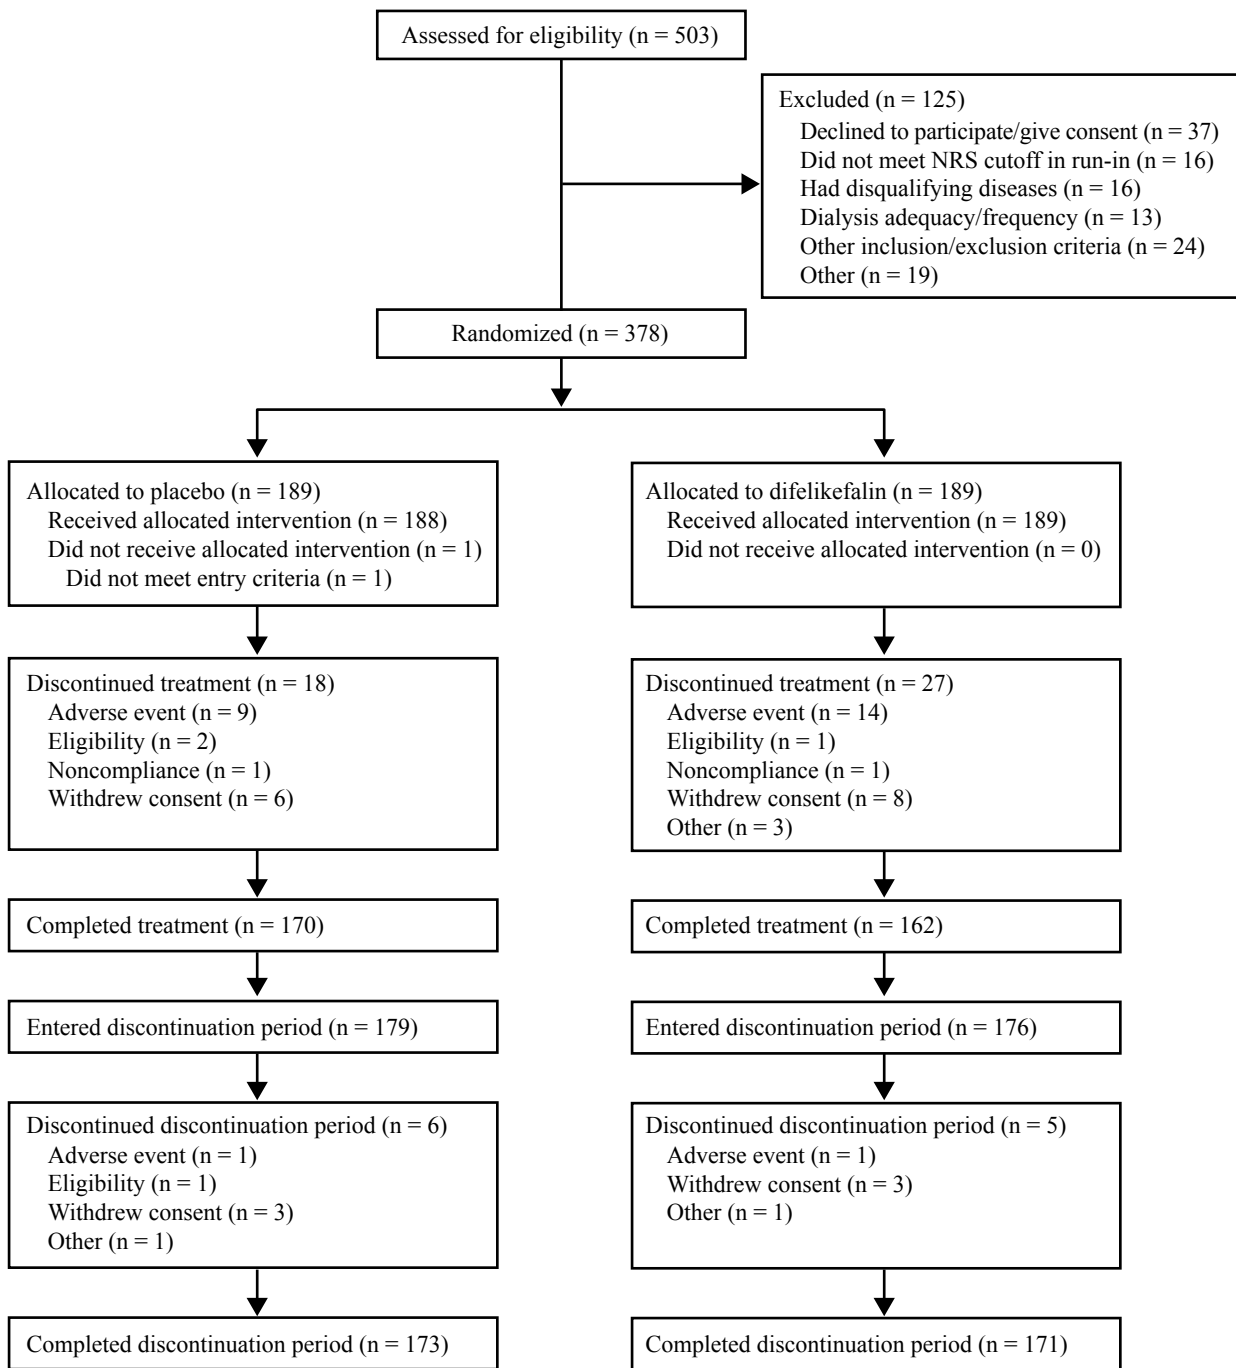

## Supplementary Figure 4. KALM-1 Open-label Phase

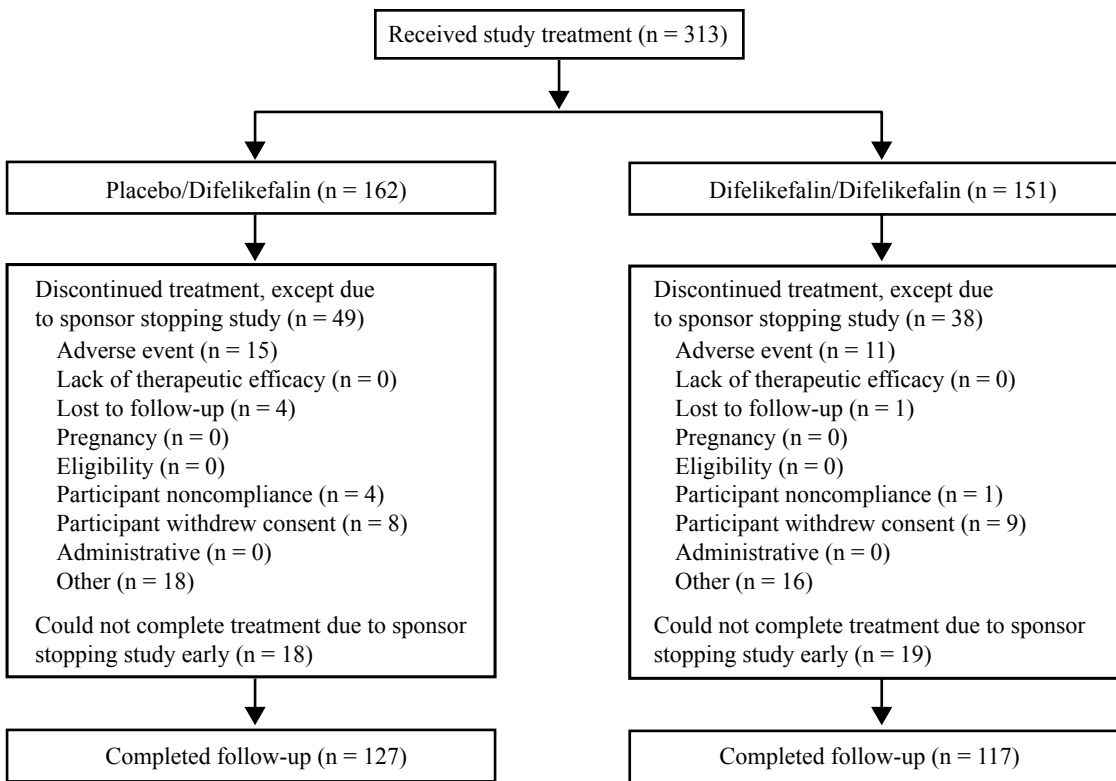

Difelikefalin/Difelikefalin = participants randomized to difelikefalin group during DB phase/received difelikefalin during OLE phase.  
Placebo/Difelikefalin = participants randomized to placebo group during DB phase/received difelikefalin during OLE phase.  
DB, double-blind; OLE, open-label extension.

# Supplementary Figure 5. KALM-2 Double-blind Phase

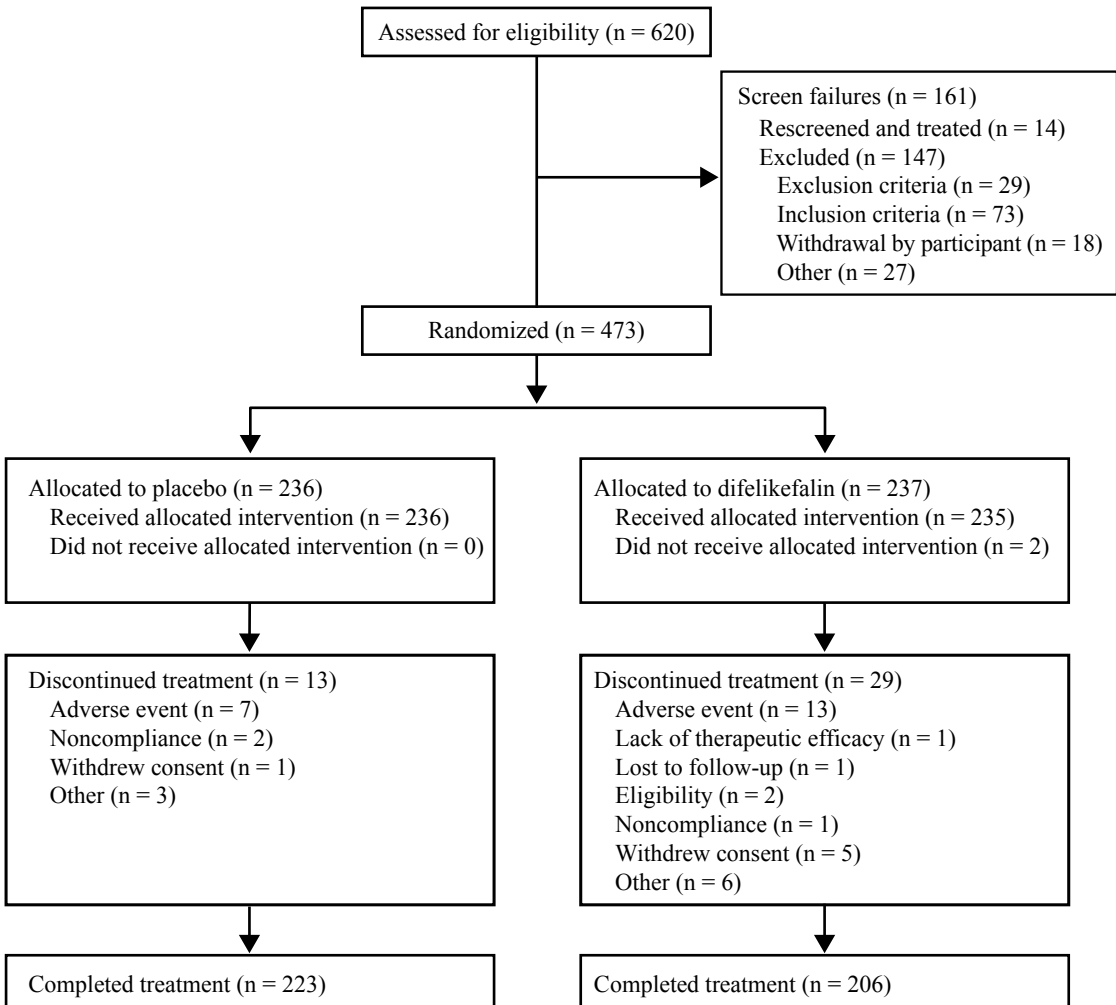

# Supplementary Figure 6. KALM-2 Open-label Phase

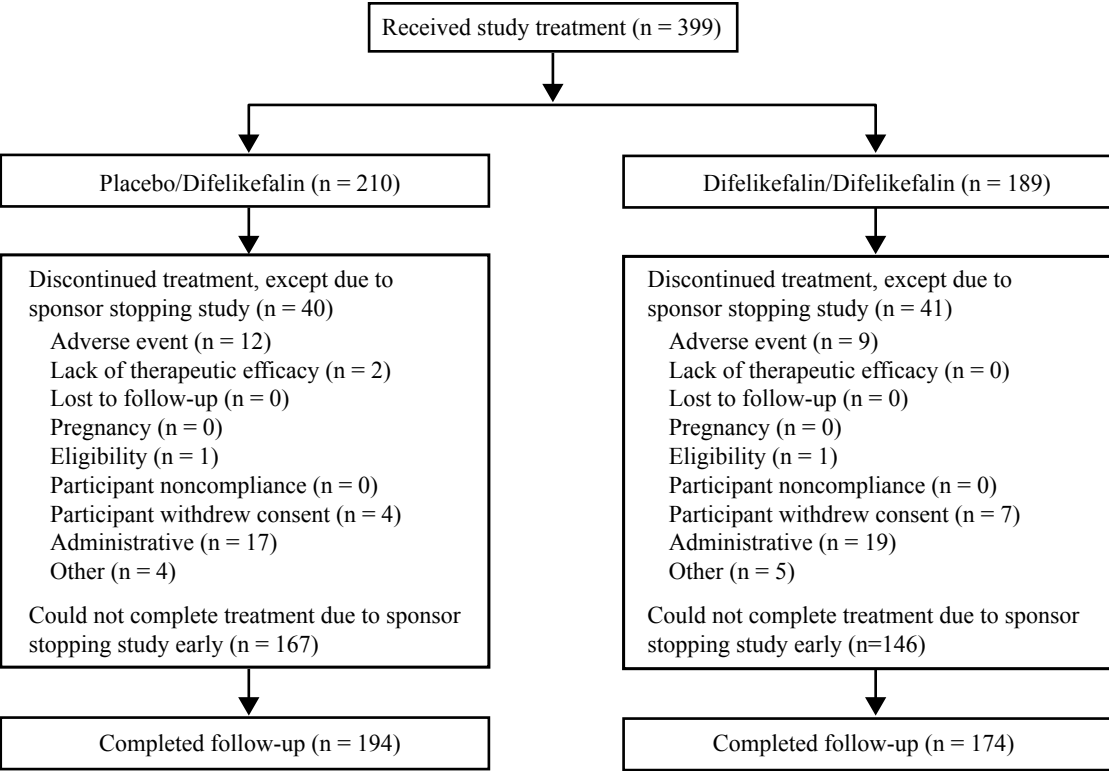

Difelikefalin/Difelikefalin = participants randomized to difelikefalin group during DB phase/received difelikefalin during OLE phase.  
 Placebo/Difelikefalin = participants randomized to placebo group during DB phase/received difelikefalin during OLE phase.  
 DB, double-blind; OLE, open-label extension.
